# Supplementary material for: Elettaria cardamomum (L.) Maton Essential Oil: An Interesting Source of Bioactive Specialized Metabolites as Inhibitors of Acetylcholinesterase and Butyrylcholinesterase
Source: MDPI journal article supplement (doi:10.3390/plants12193463), 2023-10-02
Supplement: s1 [file s1]

## Supplementary materials

**Table S1.** Chemical composition expressed as relative percent abundance (% Area) of the commercial batches analysed. Analytical percent relative standard deviation (RSD%) < 3%.

| Compounds                    | Exp <sup>T</sup> | Lit <sup>T</sup> | Batch 1 | Batch 2 | Batch 3 | Batch 4 | Batch 5 | Batch 6 |
|------------------------------|------------------|------------------|---------|---------|---------|---------|---------|---------|
| $\alpha$ -thujene            | 929              | 931              | 0.2     | 0.1     | 0.2     | 0.2     | 0.2     | 0.2     |
| $\alpha$ -pinene             | 937              | 939              | 1.2     | 1.5     | 1.5     | 1.5     | 1.4     | 1.4     |
| sabinene                     | 976              | 976              | 2.6     | 2.6     | 3.7     | 3.7     | 3.9     | 4.0     |
| $\beta$ -pinene              | 980              | 980              | 0.3     | 0.4     | 0.3     | 0.3     | 0.3     | 0.4     |
| $\beta$ -myrcene             | 991              | 991              | 0.7     | 1.2     | 1.1     | 1.3     | 1.4     | 1.9     |
| $\alpha$ -terpinene          | 1020             | 1018             | 0.1     | 0.1     | 0.1     | 0.1     | 0.1     | 0.1     |
| p-cymene                     | 1029             | 1026             | 0.5     | 0.4     | 0.3     | 0.6     | 0.9     | 0.3     |
| limonene                     | 1033             | 1031             | 1.9     | 2.4     | 2.1     | 2.3     | 2.4     | 2.3     |
| 1,8-cineole                  | 1038             | 1033             | 29.9    | 30.9    | 30.2    | 31.3    | 30.9    | 29.7    |
| $\gamma$ -terpinene          | 1062             | 1062             | 0.2     | 0.2     | 0.2     | 0.2     | 0.1     | 0.3     |
| <i>cis</i> -sabinene hydrate | 1075             | 1068             | 0.5     | 0.3     | 0.5     | 0.4     | 0.4     | 0.4     |
| linalool                     | 1103             | 1098             | 3.4     | 3.4     | 3.5     | 3.2     | 3.3     | 3.8     |
| 4-terpineol                  | 1184             | 1177             | 0.9     | 0.8     | 0.8     | 0.8     | 0.8     | 0.9     |
| $\alpha$ -terpineol          | 1198             | 1189             | 1.8     | 1.5     | 1.9     | 2.3     | 1.7     | 2.1     |
| linalyl acetate              | 1254             | 1251             | 6.5     | 7.2     | 5.9     | 5.5     | 5.4     | 6.0     |
| geraniol                     | 1256             | 1255             | 0.7     | 0.7     | 0.8     | 0.8     | 0.7     | 0.9     |
| geranial                     | 1274             | 1270             | 0.2     | 0.3     | 0.3     | 0.2     | 0.3     | 0.3     |
| $\alpha$ -terpinyl acetate   | 1353             | 1350             | 46.8    | 43.1    | 44.4    | 43.0    | 43.5    | 42.3    |
| geranyl acetate              | 1383             | 1383             | 0.6     | 0.7     | 0.5     | 0.6     | 0.7     | 0.7     |
| $\beta$ -selinene            | 1489             | 1485             | 0.3     | 0.3     | 0.2     | 0.3     | 0.2     | 0.2     |
| (Z)-nerolidol                | 1565             | 1565             | 0.7     | 0.9     | 0.9     | 0.8     | 0.8     | 0.8     |

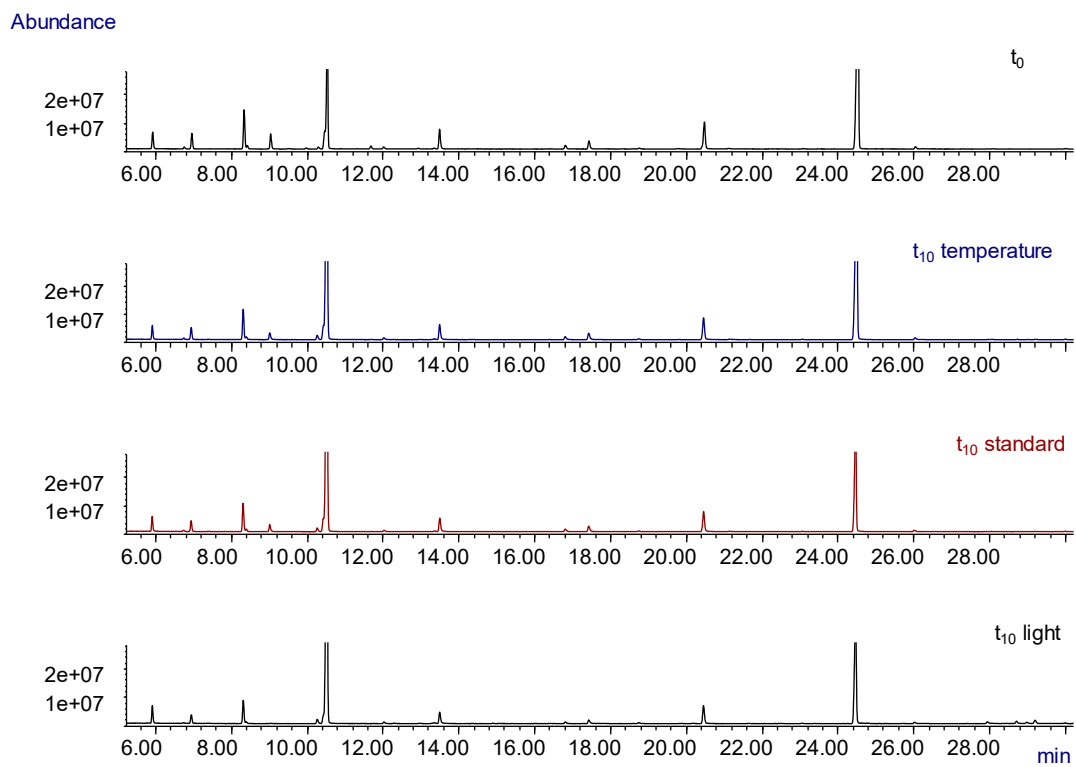

**Figure S1.** GC-MS profiles of the cardamom EO (batch 6) at  $t_0$  and at  $t_{10}$ , respectively under standard conditions, under light and under temperature stress.

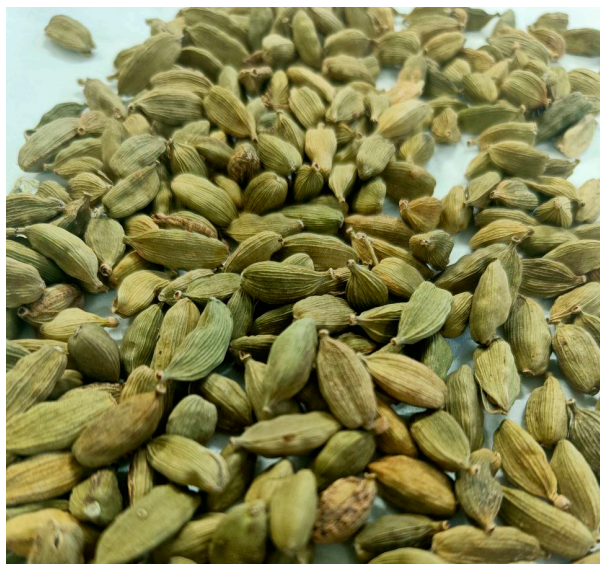

**Figure S2.** Dried fruits used to obtain the hydrodistillate EO.
